# Supplementary material
Source: PubMed Central journal article supplement (PMC6625513)
Supplement: NIHMS1039628-supplement-Supplementary_information.pdf [file NIHMS1039628-supplement-Supplementary_information.pdf]

## Supporting Information

### Generalized preparation of 2D quasi-nanosheets via self-assembly of nanoparticles

Ren Cai,<sup>‡,†,⊥</sup> Dan Yang,<sup>#,⊥</sup> Keng-Te Lin,<sup>#</sup> Yifan Lyu,<sup>†,§</sup> Bowen Zhu,<sup>||</sup> Zhen He,<sup>†,Δ</sup> Lili Zhang,<sup>‡</sup> Yusuke Kitamura,<sup>†</sup> Liping Qiu,<sup>‡</sup> Xigao Chen,<sup>†</sup> Yuliang Zhao,<sup>◇</sup> Zhuo Chen,<sup>‡,\*</sup> and Weihong Tan<sup>†,‡,§,\*</sup>

<sup>‡</sup>Molecular Science and Biomedicine Laboratory, State Key Laboratory for Chemo/Bio-Sensing and Chemometrics, College of Chemistry and Chemical Engineering, College of Biology, and Collaborative Research Center of Molecular Engineering for Theranostics, Hunan University, Changsha 410082, China

<sup>§</sup>Institute of Molecular Medicine, Renji Hospital, Shanghai Jiao Tong University School of Medicine, and College of Chemistry and Chemical Engineering, Shanghai Jiao Tong University, Shanghai, (China)

<sup>†</sup>Center for Research at Bio/Nano Interface, Department of Chemistry and Department of Physiology and Functional Genomics, Shands Cancer Center, UF Genetics Institute and McKnight Brain Institute, University of Florida, Gainesville, Florida 32611-7200, United States

<sup>◇</sup>CAS Key Lab for Biomedical Effects of Nanomaterials & Nanosafety, Institute of High Energy Physics, Chinese Academy of Sciences, Beijing 100049, China

<sup>Δ</sup>Department of Colorectal Surgery, the Sixth Affiliated Hospital, Sun Yat-sen University, 26 Yuancun Er Heng Road, Guangzhou, Guangdong, 510655, China

<sup>#</sup>Centre for Micro-Photonics, Faculty of Science, Engineering and Technology, Swinburne University of Technology, PO Box 218, Hawthorn, Australia

<sup>||</sup>School of Materials Science and Engineering, Nanyang Technological University, 50 Nanyang Avenue, Singapore 639798, Singapore

<sup>⊥</sup>These authors contributed equally to this work

\* To whom correspondence should be addressed.

Email: [tan@chem.ufl.edu](mailto:tan@chem.ufl.edu); [zhuochen@hnu.edu.cn](mailto:zhuochen@hnu.edu.cn)

# Contents

|                                                                                                          |     |
|----------------------------------------------------------------------------------------------------------|-----|
| Chemicals.....                                                                                           | S3  |
| Materials characterization.....                                                                          | S7  |
| Calculation of the number of Fe <sub>3</sub> O <sub>4</sub> nanoparticles (NPs) ( $N_{particles}$ )..... | S8  |
| Calculation of the number of 1-octadecene (ODE) molecules ( $N_{ODE}$ ).....                             | S8  |
| Calculation of the number of ODE molecules per Fe <sub>3</sub> O <sub>4</sub> NPs ( $N_0$ ).....         | S9  |
| Calculation of the number of Pd NPs ( $N_{Pd}$ ).....                                                    | S10 |
| Calculation of the number of Pt NPs ( $N_{Pt}$ ).....                                                    | S10 |
| Calculation of the number of CdSe NPs ( $N_{CdSe}$ ).....                                                | S11 |
| Figure S1.....                                                                                           | S13 |
| Figure S2.....                                                                                           | S14 |
| Figure S3.....                                                                                           | S15 |
| Figure S4.....                                                                                           | S16 |
| Figure S5.....                                                                                           | S17 |
| Figure S6.....                                                                                           | S18 |
| Figure S7.....                                                                                           | S19 |
| Figure S8.....                                                                                           | S20 |
| Figure S9.....                                                                                           | S21 |
| Figure S10.....                                                                                          | S22 |
| References.....                                                                                          | S23 |

## Chemicals

The following chemicals were used as obtained: iron (III) chloride ( $\text{FeCl}_3 \cdot 6\text{H}_2\text{O}$ , 98%, Sigma-Aldrich), oleic acid (OA, 90%, Sigma-Aldrich), 1-octadecene (ODE, 90%, technical grade, Sigma-Aldrich), 1-eicosene (99%, Sigma-Aldrich), ethylene glycol (EG, 99%, Sigma-Aldrich), octyl ether (99%, TCI), dodecyltrimethylammonium bromide (DTAB, 99%, Sigma-Aldrich), sodium oleate (97%, Sigma-Aldrich), Selenium dioxide ( $\text{SeO}_2$ , 99.9%, Sigma-Aldrich), Cadmium nitrate tetrahydrate ( $\text{Cd}(\text{NO}_3)_2 \cdot 4\text{H}_2\text{O}$ , 99.9%, Sigma-Aldrich), cadmium acetate ( $\text{Cd}(\text{C}_2\text{H}_3\text{O}_2)_2 \cdot 2\text{H}_2\text{O}$ , 99.9%, Sigma-Aldrich), platinum acetylacetonate ( $\text{Pt}(\text{acac})_2$ , 99.9%, Sigma-Aldrich), iron pentacarbonyl, ( $\text{Fe}(\text{CO})_5$ , 99.9%, Sigma-Aldrich), oleylamine (OAm, 99.9%, Sigma-Aldrich), hydroxylammonium chloride (99%, Sigma-Aldrich), trioctylphosphine (99.9%, Sigma-Aldrich), cetyltrimethylammonium bromide (99%, Sigma-Aldrich), polyvinylpyrrolidone (PVP, Mw = 55,000, 99.9%, Sigma-Aldrich), hexane (99%, Sigma-Aldrich), dimethyl sulfoxide (DMSO, 99%, Sigma-Aldrich), N,N-dimethylformamide (DMF, 99%, Sigma-Aldrich), toluene (99%, Sigma-Aldrich), chloroform (99%, Sigma-Aldrich), methanol (absolute for analysis, 99%, Sigma-Aldrich), acetone and ethanol (absolute for analysis, ACS, 99.9%, Merck). All materials were used without further purification.

**Synthesis of iron-oleate complex:** In a typical synthesis of the iron-oleate complex, 10.8 g of iron chloride ( $\text{FeCl}_3 \cdot 6\text{H}_2\text{O}$ , 98%, Sigma-Aldrich) and 36.5 g of sodium oleate were dissolved in a mixed solvent composed of 40 mL ethanol, 40 mL deionized water and 80 mL hexane. The resulting solution was heated to 60 °C and kept at that temperature for four hours. The dark red-black iron oleate precursors were dissolved in 100 mL hexane, washed 3 times with warm DI water (~50 °C) and then separated in a separatory funnel. After washing, hexane was removed by evaporation, resulting in an iron-oleate complex in a waxy solid form.

**Synthesis of iron oxide nanoparticles (NPs):**<sup>1</sup> The following represents a typical synthesis of monodisperse 16 nm iron oxide NPs. Iron-oleate complex (3.6 g) synthesized, as described above, and 0.57 g of oleic acid (90%, Sigma-Aldrich) were dissolved in 20 g 1-eicosene at room temperature. The mixture was heated to 110 °C and maintained for 60 min under Ar protection. The reaction mixture was heated to 320 °C with a constant heating rate of 3.3 °C min<sup>-1</sup> and then held 30 min. When the reaction

temperature reached 320 °C, an obvious reaction occurred, and the initial transparent solution became turbid and brownish black. The colloidal solution was washed 3 times using ethanol /hexane (1:1 v/v) by sedimentation, and redispersal was accomplished by centrifugation (5000 rpm for 10 min). Finally, the NPs were weighed and redispersed in chloroform at the desired nanoparticle concentration.

**Synthesis of Pd NPs (~ 6 nm):**<sup>2</sup> Typically, Pd(acac)<sub>2</sub> (0.1 g) was added to 1 mL of trioctylphosphine to form an orange solution. Then 10 mL of oleylamine was introduced and the mixture was degassed for 10 min. The resulting solution was slowly heated to 250 °C (5 °C/min). After 30 min, the reaction system was cooled quickly, washed with ethanol and hexane, and finally redispersed in hexane.

**Synthesis of Pt NPs (~ 3.5 nm):**<sup>3</sup> Typically, Pt(acac)<sub>2</sub> (0.1 g), octadecene (10 mL), oleic acid (OA) (1 mL), and oleylamine (OAm) (1 mL) were mixed under N<sub>2</sub> and magnetic stirring. The mixture was then heated to 65 °C to dissolve Pt(acac)<sub>2</sub>. The temperature was then raised to about 180 °C. A solution of Fe(CO)<sub>5</sub> in hexane (0.1 mL, prepared by adding 0.1 mL Fe(CO)<sub>5</sub> in 1 mL hexane under argon) was quickly injected into the hot solution. The solution was further heated to 200 °C and kept at this temperature for 1 hour before it was cooled down to room temperature. 40 mL of isopropanol was added and then the suspension was centrifuged (8000 rpm, 10 min) to separate the NPs. The particles were dispersed in 10 mL hexane and precipitated out by adding ethanol. The process was repeated one more time to purify the NPs. The final product (50 mg) was dispersed in 10 mL of hexane for further use.

**Synthesis of CdSe NPs (~ 15 nm):**<sup>4</sup> 0.1 mmol of CdO, 4 mmol of zinc acetate and 5 ml of oleic acid were placed in a 50 mL flask and heated to 150 °C in flowing high-purity N<sub>2</sub> for 30 min. Then 15 mL of 1-octadecene was added to the flask and the temperature increased to 300 °C. A stock solution containing 2 mL of trioctylphosphine, 0.2 mmol of Se and 3 mmol of S was quickly injected into the flask. The reaction temperature was maintained for 20 min and then cooled to room temperature. The resulting QDs were washed several times (minimum of three times) and finally dispersed in toluene at 10 mg mL<sup>-1</sup>.

**Synthesis of free-standing 2D unary QNS from Pd NPs, Pt NPs and CdSe NPs:** In a typical self-assembly experiment, 15 μL ODE was added to a hexane solution of each NPs (1 mg, 500 μL) by a vortex mixer for 30 min. The remaining experimental steps were same as those for the synthesis of 2D Fe<sub>3</sub>O<sub>4</sub> QNS.

### **Synthesis of free-standing 2D binary QNS from co-assembly of Fe<sub>3</sub>O<sub>4</sub> NPs and Pd NPs: (I)**

Preparation of Fe<sub>3</sub>O<sub>4</sub> NP-micelles: 16  $\mu$ L ODE were dissolved into a hexane solution of 16-nm Fe<sub>3</sub>O<sub>4</sub> NPs (1 mg, 0.45 mL) for 30 min by a vortex mixer. Then, an aqueous solution containing DTAB (100  $\mu$ L, 20 mg/mL) was added to the mixture. Afterwards, the mixture was heated and vigorously agitated by vortexing for 15 min. Subsequently, 0.75 mL of mixed solvent (EG and PVP) was added swiftly to the emulsion and vortexed for 90s.

(II) Preparation of Pd NP-micelles: Using the same strategy, 20  $\mu$ L ODE were used to stabilize Pd NPs (1 mg, 0.45 mL) to form NP-micelles prior to the self-assembly process, respectively.

(III) Co-assembly of Fe<sub>3</sub>O<sub>4</sub> NPs and Pd NPs to form free-standing 2D binary QNS: While vortexing, 1.2 mL of above Pd NP-micelles were added into the Fe<sub>3</sub>O<sub>4</sub> NP-micelles drop by drop in 1 min and subjected to further vigorous vortexing for another 2 min. The mixture was then heated to 83 °C, kept at this temperature for 120 min to evaporate the residual hexane phase, and then held for another 1 h before the suspension was cooled to room temperature. Finally, the resulting products were washed with ethanol, centrifuged at 4000 rpm for 8 min, and redispersed in ethanol.

**Synthesis of free-standing 2D binary QNS from co-assembly of two types of NPs:** Fe<sub>3</sub>O<sub>4</sub> NPs - Pt NPs; Fe<sub>3</sub>O<sub>4</sub> NPs - CdSe NPs; Pd NPs - Pt NPs; Pd NPs - CdSe NPs; Pt NPs - CdSe NPs: In a typical self-assembly experiment, 20  $\mu$ L ODE was added to a hexane solution of each NPs (1 mg, 450  $\mu$ L) by a vortex mixer for 30 min. The remaining experimental steps were same as those for the synthesis of 2D binary QNS of Fe<sub>3</sub>O<sub>4</sub> - Pd.

**Synthesis of free-standing 2D ternary QNS from co-assembly of three types of NPs (Fe<sub>3</sub>O<sub>4</sub> NPs - Pd NPs - Pt NPs):** (I) Preparation of Fe<sub>3</sub>O<sub>4</sub> NP-micelles: 8  $\mu$ L ODE were dissolved into a hexane solution of 16-nm Fe<sub>3</sub>O<sub>4</sub> NPs (0.5 mg, 0.40 mL) for 20 min by a vortex mixer. Then, an aqueous solution containing DTAB (50  $\mu$ L, 20 mg/mL) was added to the mixture. Afterwards, the mixture was heated and vigorously agitated by vortexing for 10 min. Subsequently, 0.75 mL of mixed solvent (EG and PVP) was added swiftly to the emulsion and vortexed for 90s.

(II) Preparation of Pd NP-micelles: 8  $\mu$ L ODE were used to stabilize 6-nm Pd NPs (0.5 mg, 0.40 mL) for 20 min by a vortex mixer. Then, an aqueous solution containing DTAB (50  $\mu$ L, 20 mg/mL) was added

to the mixture. Using the same strategy, this mixture was to form NP-micelles.

(III) Preparation of Pt NP-micelles: 10  $\mu\text{L}$  ODE were used to stabilize 3.5-nm Pt NPs (0.5 mg, 0.40 mL) for 20 min by a vortex mixer. Then, an aqueous solution containing DTAB (50  $\mu\text{L}$ , 20 mg/mL) was added to the mixture. Using the same strategy, this mixture was to form NP-micelles.

(IV) Co-assembly of  $\text{Fe}_3\text{O}_4$  NPs, Pd NPs, and Pt NPs to form 2D ternary QNS: while vortexing, 1.2 mL of above Pd NP-micelles were added into the  $\text{Fe}_3\text{O}_4$  NP-micelles drop by drop in 1 min and subjected to further vigorous vortexing for another 2 min. The next, 1.2 mL of above Pt NP-micelles were added into as-obtained mixture drop by drop in 1 min and subjected to further vigorous vortexing for another 2 min. The mixture was then heated to 83  $^\circ\text{C}$ , kept at this temperature for 120 min to evaporate the residual hexane phase, and then held for another 1 h before the suspension was cooled to room temperature. Finally, the resulting products were washed with ethanol, centrifuged at 4000 rpm for 8 min, and redispersed in ethanol.

The remaining experimental steps were same as those for the synthesis of 2D ternary QNS from  $\text{Fe}_3\text{O}_4$  NPs - CdSe NPs - Pd NPs;  $\text{Fe}_3\text{O}_4$  NPs - CdSe NPs - Pt NPs; CdSe NPs - Pd NPs - Pt NPs.

**Synthesis of free-standing 2D quaternary QNS from co-assembly of four types of NPs ( $\text{Fe}_3\text{O}_4$  NPs - CdSe NPs - Pd NPs - Pt NPs):** (I) Preparation of  $\text{Fe}_3\text{O}_4$  NP-micelles: 9.6  $\mu\text{L}$  ODE were dissolved into a hexane solution of 16-nm  $\text{Fe}_3\text{O}_4$  NPs (0.6 mg, 0.41 mL) for 20 min by a vortex mixer. Then, an aqueous solution containing DTAB (60  $\mu\text{L}$ , 20 mg/mL) was added to the mixture. Afterwards, the mixture was heated and vigorously agitated by vortexing for 10 min. Subsequently, 0.5 mL of mixed solvent (EG and PVP) was added swiftly to the emulsion and vortexed for 90 s.

(II) Preparation of CdSe NP-micelles: 9.6  $\mu\text{L}$  ODE were used to stabilize 6-nm CdSe NPs (0.6 mg, 0.41 mL) for 20 min by a vortex mixer. Then, an aqueous solution containing DTAB (60  $\mu\text{L}$ , 20 mg/mL) was added to the mixture. Using the same strategy, this mixture was to form NP-micelles.

(III) Preparation of Pd NP-micelles: 6.5  $\mu\text{L}$  ODE were used to stabilize 3.5-nm Pd NPs (0.4 mg, 0.40 mL) for 20 min by a vortex mixer. Then, an aqueous solution containing DTAB (60  $\mu\text{L}$ , 20 mg/mL) was added to the mixture. Using the same strategy, this mixture was to form NP-micelles.

(IV) Preparation of Pt NP-micelles: Using the same strategy, 8  $\mu\text{L}$  ODE were used to stabilize 3.5-nm

Pt NPs (0.4 mg, 0.40 mL) for 20 min by a vortex mixer. Then, an aqueous solution containing DTAB (60  $\mu$ L, 20 mg/mL) was added to the mixture. Using the same strategy, this mixture was to form NP-micelles.

(V) Co-assembly of Fe<sub>3</sub>O<sub>4</sub> NPs, CdSe NPs, Pd NPs, and Pt NPs to form 2D quaternary QNS: While vortexing, the above Pd NP-micelles were added into the Fe<sub>3</sub>O<sub>4</sub> NP-micelles drop by drop in 1 min and subjected to further vigorous vortexing for another 2 min. Secondly, the above Pt NP-micelles were added into as-obtained mixture drop by drop in 1 min and subjected to further vigorous vortexing for another 2 min. Thirdly, the above CdSe NP-micelles were added into as-obtained mixture drop by drop in 1 min and subjected to further vigorous vortexing for another 2 min. The mixture was then heated to 83 °C, kept at this temperature for 120 min to evaporate the residual hexane phase, and then held for another 1 h before the suspension was cooled to room temperature. Finally, the resulting products were washed with ethanol, centrifuged at 4000 rpm for 8 min, and redispersed in ethanol.

### **Materials Characterization**

Morphology of the samples was characterized with a transmission electron microscope (TEM) system (JEOL Model JEM-2010F) operating at 200 kV, and scanning electron microscopy (SEM) system (JEOL Model 7600F). Atomic force microscopy (AFM) (Digital Instruments) was used to determine the thickness of the QNS. NMR spectra were recorded in CDCl<sub>3</sub> on a Varian Unity spectrometer (400 MHz for <sup>1</sup>H NMR) at 27 °C. All spectra were examined using MestReNova 8.1 (Mnova) software and displayed without the use of the signal suppression function.

### Calculation of the number of Fe<sub>3</sub>O<sub>4</sub> nanoparticles (NPs) ( $N_{particles}$ )

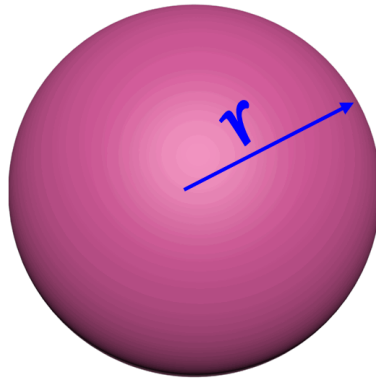

For one Fe<sub>3</sub>O<sub>4</sub> NP, the radius is  $r$ . The density, mass and volume are  $\rho$ ,  $m_1$  and  $V_1$ . The mass of one Fe<sub>3</sub>O<sub>4</sub> NP ( $m_1$ ) was calculated as

$$m_1 = \rho \cdot V_1 \quad (1)$$

$$V_1 = \frac{4}{3} \pi r^3 \quad (2)$$

$$m_1 = \rho \cdot V_1 = \rho \cdot \frac{4}{3} \pi r^3 \quad (3)$$

The number of Fe<sub>3</sub>O<sub>4</sub> NPs ( $N_{particles}$ ) was calculated as

$$N_{particles} = \frac{m_{Total}}{m_1} = \frac{m_{Total}}{\rho \cdot V_1} = \frac{m_{Total}}{\rho \cdot \frac{4}{3} \pi r^3} \quad (4)$$

where  $\rho=5.17$  g/cm<sup>3</sup>,  $d=2r=16\pm0.5$  nm, and  $m_{Total}$  is the total mass weighted in the experiment:  $m_{Total}=1$  mg and  $N_{particles}=9.023 \times 10^{13}$  in 1 mg total mass.

### Calculation of the number of 1-octadecene (ODE) molecules ( $N_{ODE}$ )

For ODE molecules,  $N_A$  is Avogadro's number ( $N_A=6.022 \times 10^{23}$  mol<sup>-1</sup>),  $n$  is the number of mole,  $M_{ODE}$  is the molecular weight, and  $m$  is total mass. The number of ODE molecules ( $N_{ODE}$ ) was calculated as

$$N_{ODE} = n \cdot N_A \quad (5)$$

$$n = \frac{m}{M_{ODE}} \quad (6)$$

$$m = \rho \cdot V \quad (7)$$



The number of ODE molecules ( $N_{ODE}$ ) was calculated as

$$N_{ODE} = n \cdot N_A = \frac{m}{M_{ODE}} \cdot N_A = \frac{\rho \cdot V}{M_{ODE}} \cdot N_A \quad (8)$$

where  $\rho=0.789 \text{ g/cm}^3$ ,  $M_{ODE}= 252.48 \text{ g/mol}$ , and the ODE content of the purchased material was 90% (ODE, 90%, technical grade, Sigma-Aldrich).

#### Calculation of the number of ODE molecules per $\text{Fe}_3\text{O}_4$ NP ( $N_0$ )

$$N_0 = \frac{N_{ODE}}{N_{particles}}$$

The  $N_{ODE}$  and  $N_0$  were calculated as follows:

| $V_{ODE}$        | $N_{ODE}$              | $N_0$               |
|------------------|------------------------|---------------------|
| 0 $\mu\text{L}$  | 0                      | 0                   |
| 4 $\mu\text{L}$  | $6.775 \times 10^{18}$ | $7.509 \times 10^4$ |
| 8 $\mu\text{L}$  | $1.355 \times 10^{19}$ | $1.502 \times 10^5$ |
| 16 $\mu\text{L}$ | $2.710 \times 10^{19}$ | $3.003 \times 10^5$ |
| 24 $\mu\text{L}$ | $4.065 \times 10^{19}$ | $4.505 \times 10^5$ |
| 32 $\mu\text{L}$ | $5.420 \times 10^{19}$ | $6.006 \times 10^5$ |
| 40 $\mu\text{L}$ | $6.775 \times 10^{19}$ | $7.509 \times 10^5$ |
| 48 $\mu\text{L}$ | $8.120 \times 10^{19}$ | $9.010 \times 10^5$ |

These data were used to prepare **Figure 2f**.

### Calculation of the number of Pd NPs ( $N_{Pd}$ )

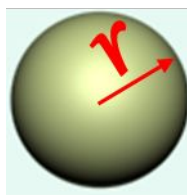

For one Pd NP, the radius is  $r$ . The density, mass and volume are  $\rho$ ,  $m_2$  and  $V_2$ . The mass of one Pd NP ( $m_2$ ) was calculated as

$$m_2 = \rho \cdot V_2 \quad (9)$$

$$V_2 = \frac{4}{3} \pi r^3 \quad (10)$$

$$m_2 = \rho \cdot V_2 = \rho \cdot \frac{4}{3} \pi r^3 \quad (11)$$

The number of Pd NPs ( $N_{Pd}$ ) was calculated as

$$N_{Pd} = \frac{m_{Total}}{m_2} = \frac{m_{Total}}{\rho \cdot V_2} = \frac{m_{Total}}{\rho \cdot \frac{4}{3} \pi r^3} \quad (12)$$

where  $\rho=11.9 \text{ g/cm}^3$ ,  $d=2r=6\pm0.5 \text{ nm}$ , and  $m_{Total}$  is the total mass weighted in the experiment:  $m_{Total}=1 \text{ mg}$  and  $N_{Pd}=7.433 \times 10^{14}$  in 1 mg total mass.

### Calculation of the number of Pt NPs ( $N_{Pt}$ )

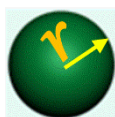

For one Pt NP, the radius is  $r$ . The density, mass and volume are  $\rho$ ,  $m_3$  and  $V_3$ . The mass of one Pt NP ( $m_3$ ) was calculated as

$$m_3 = \rho \cdot V_3 \quad (13)$$

$$V_3 = \frac{4}{3} \pi r^3 \quad (14)$$

$$m_3 = \rho \cdot V_3 = \rho \cdot \frac{4}{3} \pi r^3 \quad (15)$$

The number of Pt NPs ( $N_{Pt}$ ) was calculated as

$$N_{Pt} = \frac{m_{Total}}{m_3} = \frac{m_{Total}}{\rho \bullet V_3} = \frac{m_{Total}}{\rho \bullet \frac{4}{3} \pi r^3} \quad (16)$$

where  $\rho=21.45$  g/cm<sup>3</sup>,  $d=2r=3.5\pm0.5$  nm, and  $m_{Total}$  is the total mass weighted in the experiment:  $m_{Total}=1$  mg and  $N_{Pt}=2.078 \times 10^{15}$  in 1 mg total mass.

### Calculation of the number of CdSe NPs ( $N_{CdSe}$ )

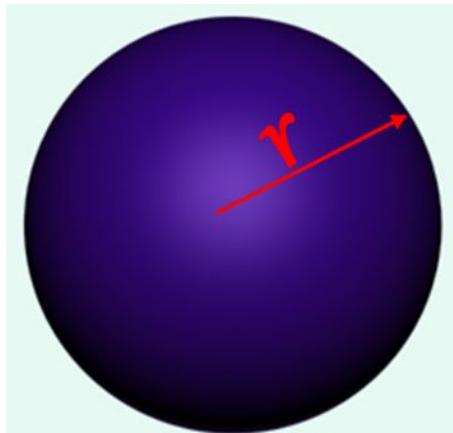

For one CdSe NP, the radius is  $r$ . The density, mass and volume are  $\rho$ ,  $m_4$  and  $V_4$ . The mass of one CdSe NP ( $m_4$ ) was calculated as

$$m_4 = \rho \bullet V_4 \quad (17)$$

$$V_4 = \frac{4}{3} \pi r^3 \quad (18)$$

$$m_4 = \rho \bullet V_4 = \rho \bullet \frac{4}{3} \pi r^3 \quad (19)$$

The number of CdSe NPs ( $N_{CdSe}$ ) was calculated as

$$N_{CdSe} = \frac{m_{Total}}{m_4} = \frac{m_{Total}}{\rho \bullet V_4} = \frac{m_{Total}}{\rho \bullet \frac{4}{3} \pi r^3} \quad (20)$$

where  $\rho=5.82$  g/cm<sup>3</sup>,  $d=2r=15\pm0.5$  nm, and  $m_{Total}$  is the total mass weighted in the experiment:  $m_{Total}=1$  mg and  $N_{CdSe}=9.728 \times 10^{13}$  in 1 mg total mass.

**Calculation of the mole ratio of NPs ( $N_0$ ) and mass ratio of NPs ( $M_0$ ) for 2D binary QNS from co-assembly of two types of NPs**

| <i>Binary QNS</i>                     | <i>ratio</i>             | $N_0$     | $M_0$ |
|---------------------------------------|--------------------------|-----------|-------|
| Fe <sub>3</sub> O <sub>4</sub> - Pd   | $N_{Fe_3O_4} : N_{Pd}$   | 1 : 8.23  | 1 : 1 |
| Fe <sub>3</sub> O <sub>4</sub> - Pt   | $N_{Fe_3O_4} : N_{Pt}$   | 1 : 23.03 | 1 : 1 |
| Fe <sub>3</sub> O <sub>4</sub> - CdSe | $N_{Fe_3O_4} : N_{CdSe}$ | 1 : 1.08  | 1 : 1 |
| Pd - Pt                               | $N_{Pd} : N_{Pt}$        | 1 : 2.80  | 1 : 1 |
| CdSe - Pd                             | $N_{CdSe} : N_{Pd}$      | 1 : 7.64  | 1 : 1 |
| CdSe - Pt                             | $N_{CdSe} : N_{Pt}$      | 1 : 21.36 | 1 : 1 |

**Calculation of the mole ratio of NPs ( $N_0$ ) and mass ratio of NPs ( $M_0$ ) for 2D ternary QNS from co-assembly of three types of NPs**

| <i>Ternary QNS</i>                         | <i>ratio</i>                      | $N_0$            | $M_0$     |
|--------------------------------------------|-----------------------------------|------------------|-----------|
| Fe <sub>3</sub> O <sub>4</sub> - Pd - Pt   | $N_{Fe_3O_4} : N_{Pd} : N_{Pt}$   | 1 : 8.23 : 23.03 | 1 : 1 : 1 |
| Fe <sub>3</sub> O <sub>4</sub> - CdSe - Pd | $N_{Fe_3O_4} : N_{CdSe} : N_{Pd}$ | 1 : 1.08 : 8.23  | 1 : 1 : 1 |
| Fe <sub>3</sub> O <sub>4</sub> - CdSe - Pt | $N_{Fe_3O_4} : N_{CdSe} : N_{Pt}$ | 1 : 1.08 : 23.03 | 1 : 1 : 1 |
| CdSe - Pd - Pt                             | $N_{CdSe} : N_{Pd} : N_{Pt}$      | 1 : 7.64 : 21.36 | 1 : 1 : 1 |

**Calculation of the mole ratio of NPs ( $N_0$ ) and mass ratio of NPs ( $M_0$ ) for 2D quaternary QNS from co-assembly of four types of NPs**

| <i>Quaternary QNS</i>                           | <i>ratio</i>                               | $N_0$                      | $M_0$                  |
|-------------------------------------------------|--------------------------------------------|----------------------------|------------------------|
| Fe <sub>3</sub> O <sub>4</sub> - CdSe - Pd - Pt | $N_{Fe_3O_4} : N_{CdSe} : N_{Pd} : N_{Pt}$ | 1 : 1.08 : 5.49 :<br>15.35 | 1 : 1 : 0.67 :<br>0.67 |

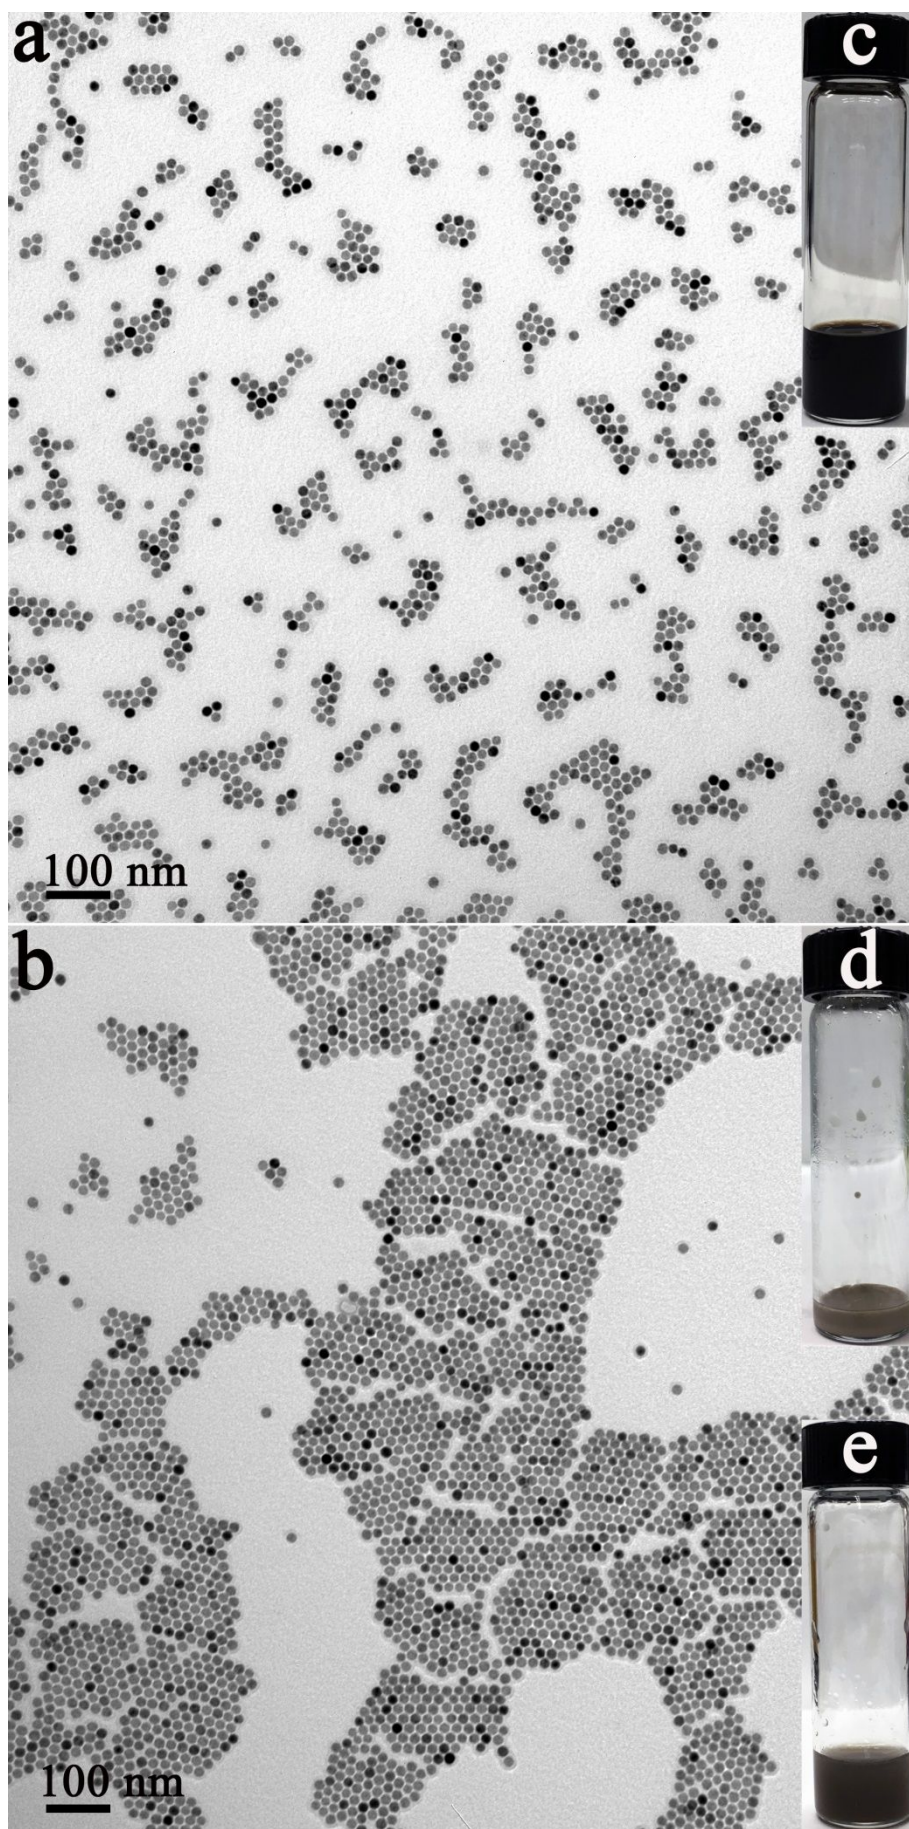

**Figure S1** TEM images of (a) Fe<sub>3</sub>O<sub>4</sub> NPs (~16 nm) and (b) Fe<sub>3</sub>O<sub>4</sub> NP micelles (contained ODE and DTAB); photograph of (c) Fe<sub>3</sub>O<sub>4</sub> NPs (~16 nm), (d) Fe<sub>3</sub>O<sub>4</sub> NP micelles and (e) mixed solution (EG and PVP) added into NP micelles (before thermal annealing).

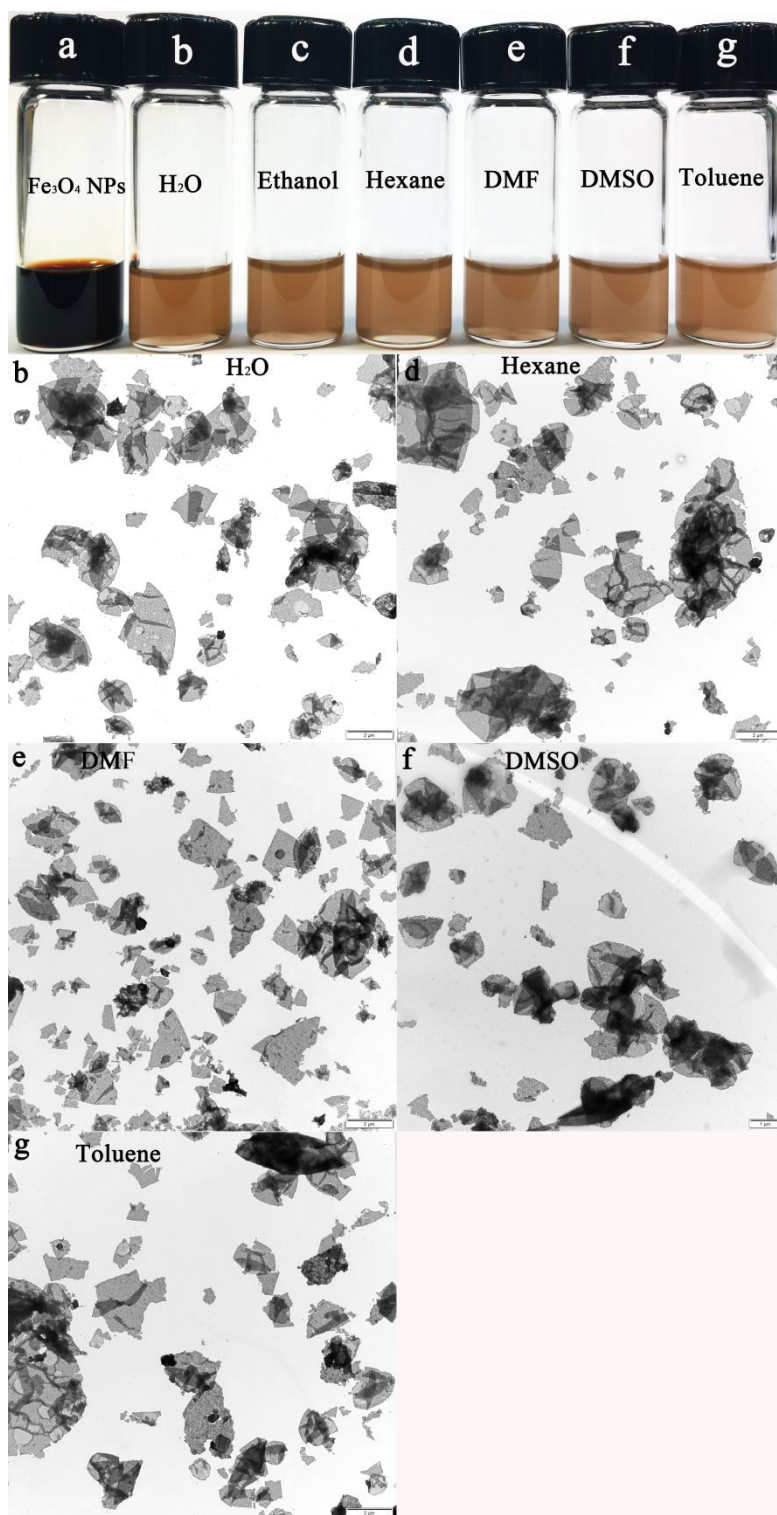

**Figure S2** The TEM images of free-standing 2D QNS in different solvents after keeping 1 day: a) Fe<sub>3</sub>O<sub>4</sub> NP building blocks (**Figure S1**); b) DI-water; c) ethanol (**Figure 1**); d) hexane; e) DMF; f) DMSO; g) toluene.

**Note:** To investigate the stability, we dispersed 2D QNS in different solvents and kept them for 7 days at room temperature. From **Figure S2b-g**, the color of all solutions is yellow, which is totally

different from that of their NP building blocks (black, **Figure S2a**). Our TEM results confirmed that the samples were stable without disassembly (**Figure S2** and **Figure 1**). Therefore, as-assembled 2D QNS exhibited excellent stability in different solvents (DI-water, ethanol, hexane, DMF, DMSO, toluene) for long time rather than disassembly into their NP building blocks.

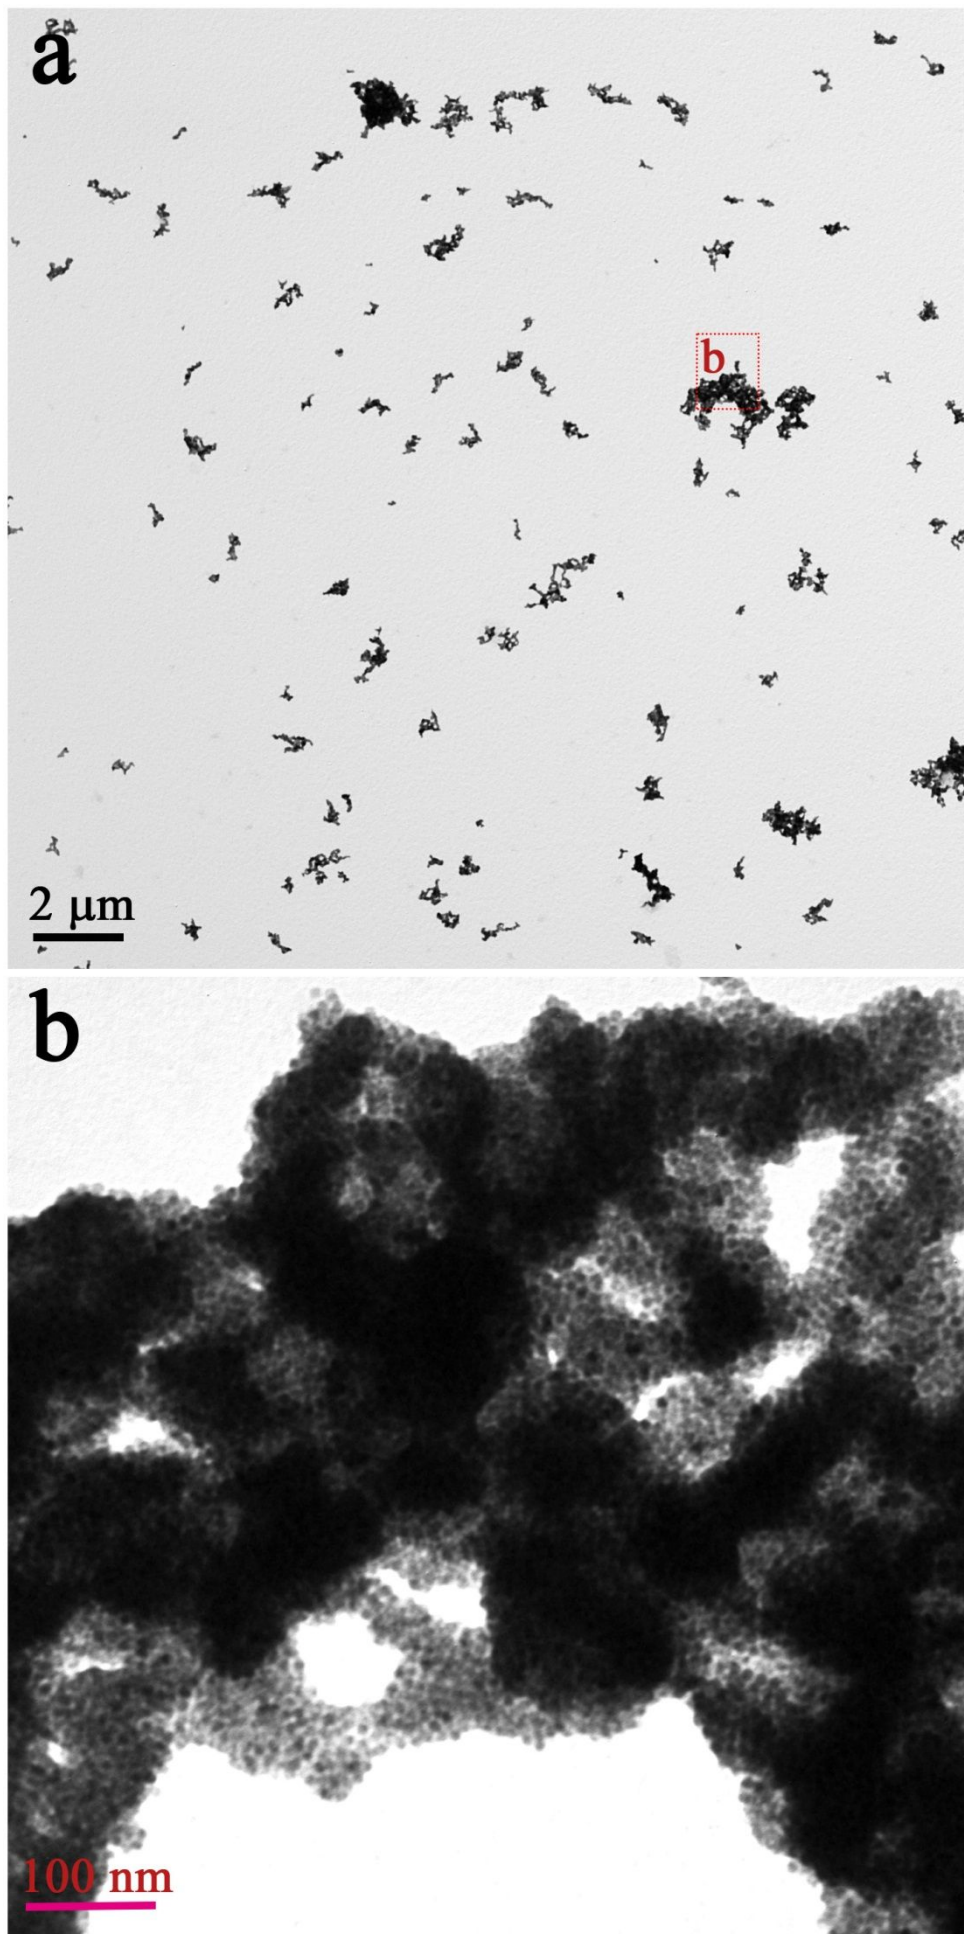

**Figure S3** TEM images of samples prepared from Fe<sub>3</sub>O<sub>4</sub> NPs assembly without DTAB.



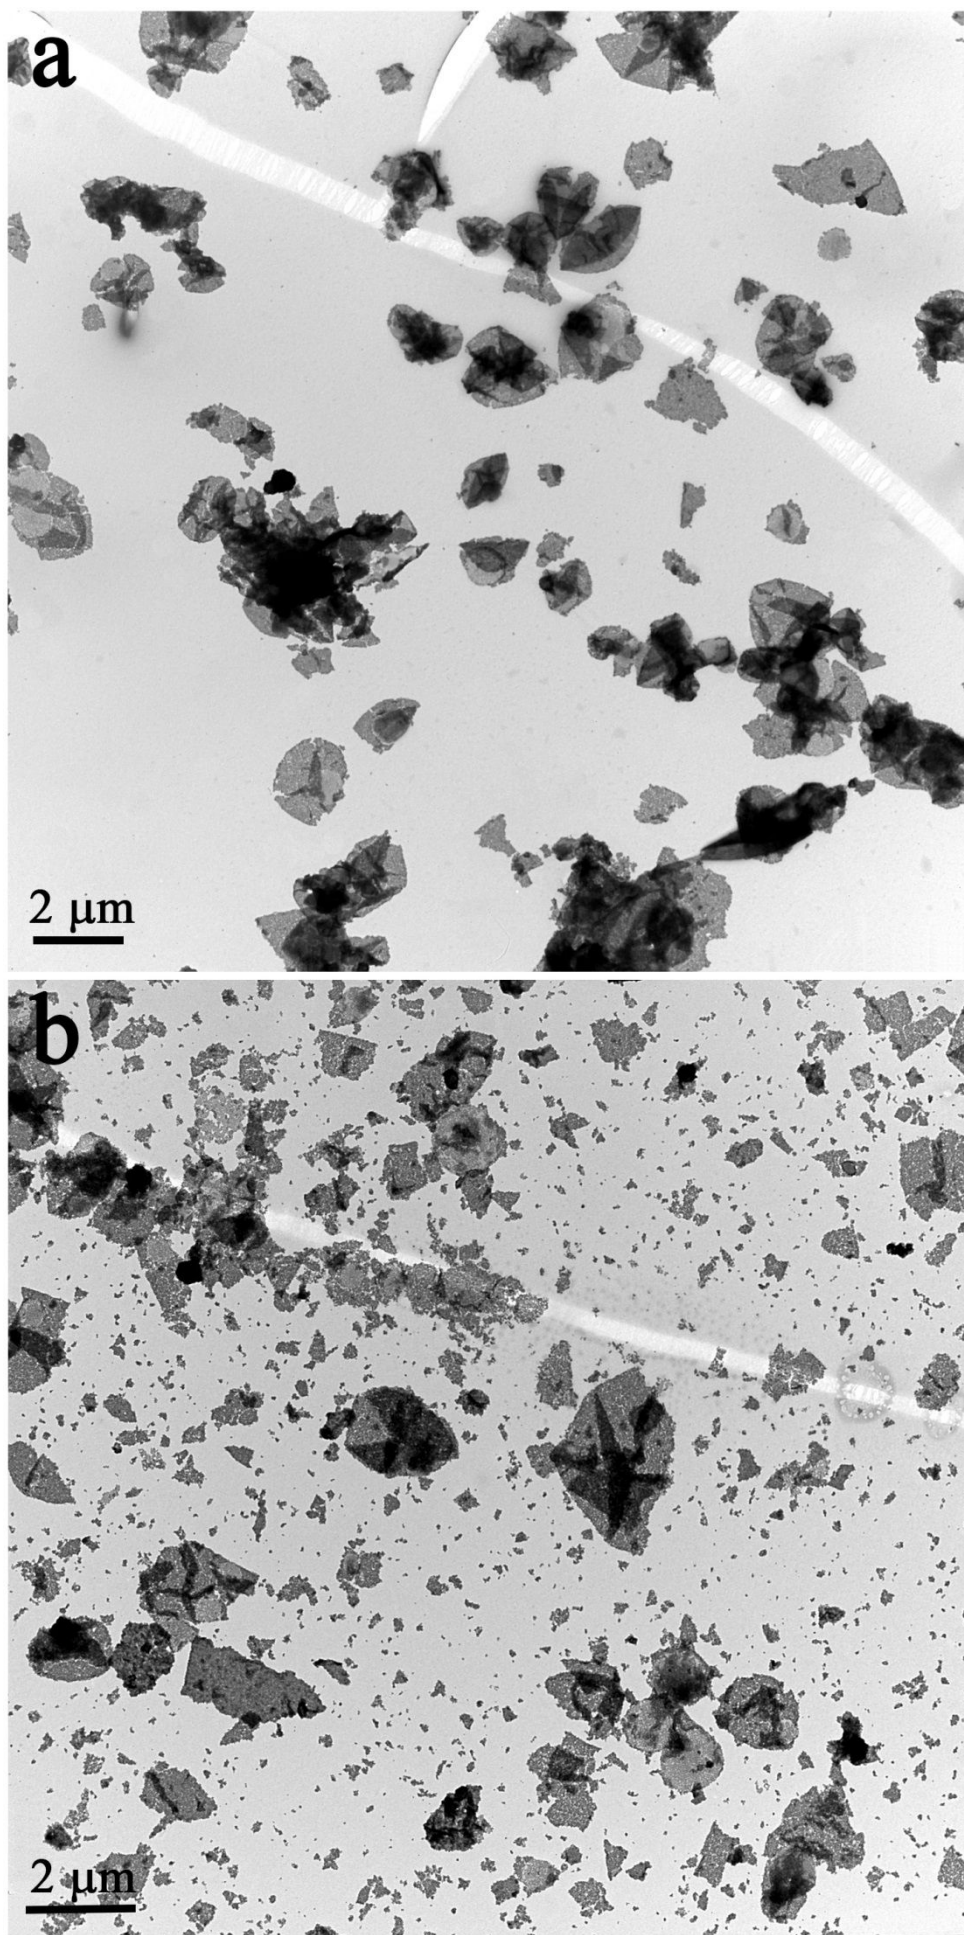

**Figure S4** TEM images of samples prepared from  $\text{Fe}_3\text{O}_4$  NPs assembly using different amounts of ODE: a) 16  $\mu\text{L}$  and b) 40  $\mu\text{L}$ .

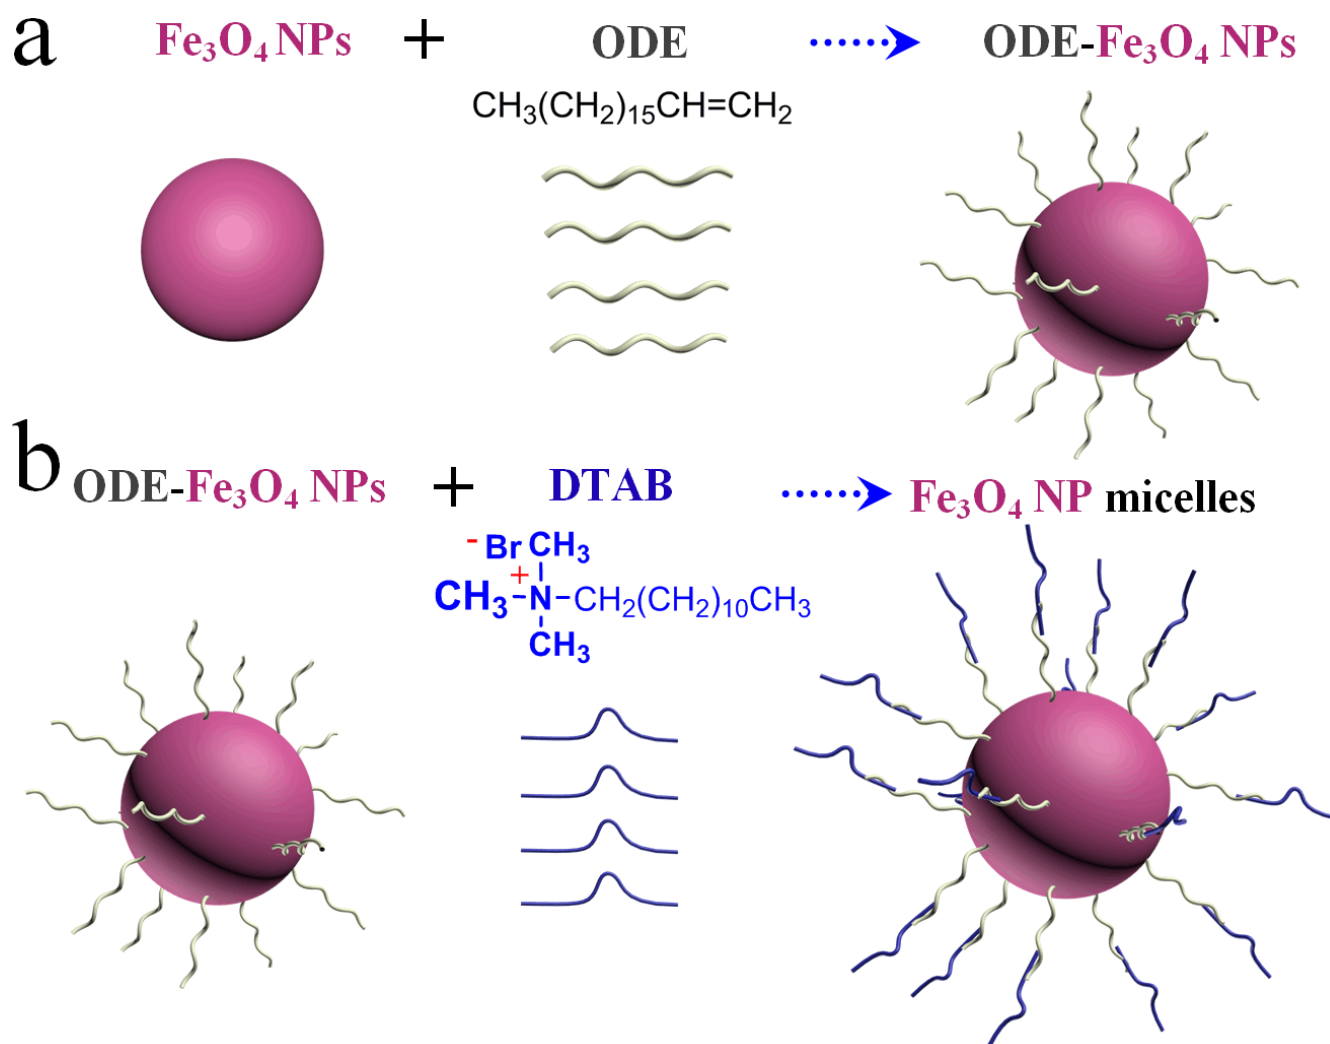

**Figure S5** Scheme of  $\text{Fe}_3\text{O}_4$  NP micelles: a) ODE-capped NPs; b) NP micelles.

**Note:** These micelles were synthesized as follows: A DTAB solution was added to ODE-capped  $\text{Fe}_3\text{O}_4$  NPs ( $\text{ODE-Fe}_3\text{O}_4$ , **Figure S5a**) in chloroform and heated to create a water-in-oil microemulsion (**Figure S5b**). After injection, some NP micelles were quickly encapsulated by mixed solvent (EG and PVP), which is a protective layer to stabilize these capping micelles through repulsive steric interactions (**Figure 3a**).<sup>5</sup> During the thermal-annealing process (83 °C, 4 h), chloroform evaporated from the system, and the DTAB layer (secondary layer, **Figure S5b**) detached from the surface of NP micelles, because of the good solubility of DTAB in mixed solvent.<sup>6</sup> This led to micelle decomposition to reform  $\text{ODE-Fe}_3\text{O}_4$  NPs in polar solvent (EG) (**Figure 3b**). Finally, the distance between NPs gradually increases because of the increase of ligand elastic repulsion,<sup>7</sup> weakening the attractive forces between NPs and facilitating the spread of NPs (**Figure 3c**),<sup>8</sup> finally leading to the formation of 2D lamellar structures (**Figure 2c-d**, **Figure 3d** and **Figure 1**).<sup>9</sup>

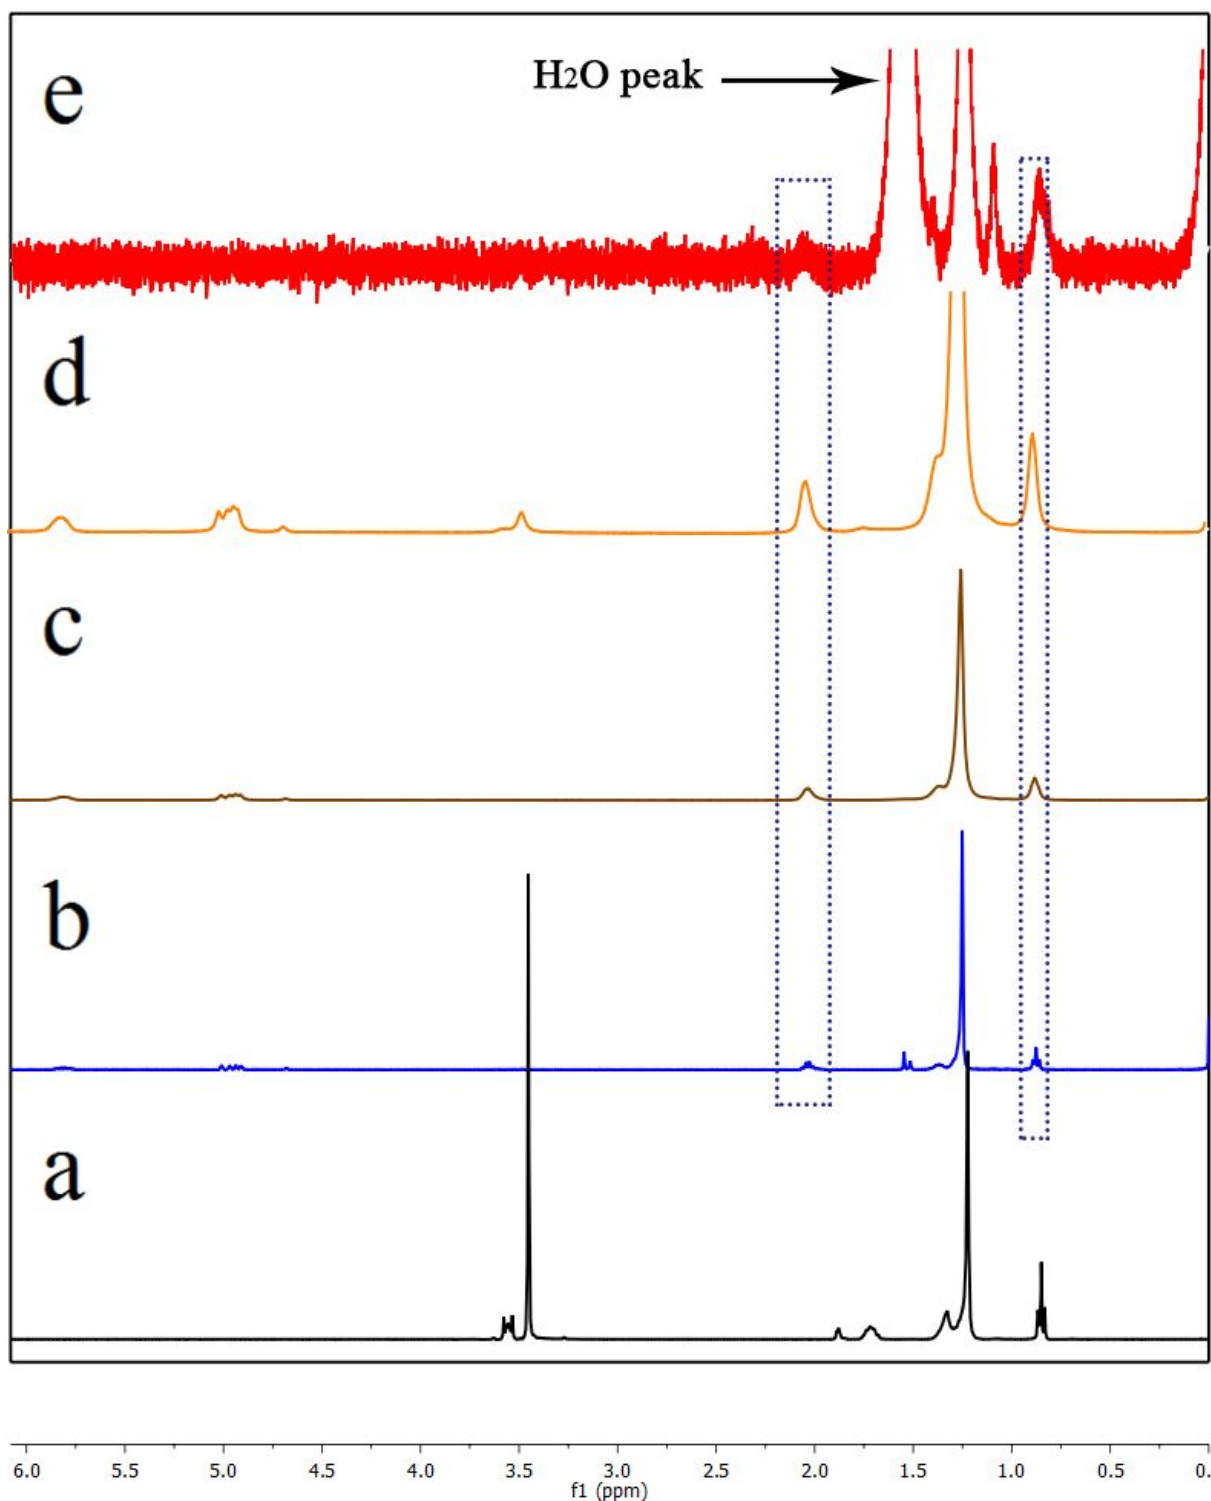

**Figure S6**  $^1\text{H}$  NMR spectra of a) DTAB; b) ODE; c) ODE-capped  $\text{Fe}_3\text{O}_4$  NPs; d)  $\text{Fe}_3\text{O}_4$  NP micelles (DTAB and ODE capped on the  $\text{Fe}_3\text{O}_4$  NPs); and e) the residual organic ligands (ODE) on the  $\text{Fe}_3\text{O}_4$  QNS. ( $^1\text{H}$  NMR of  $\text{Fe}_3\text{O}_4$  QNS was performed after HCl was used to dissolve them in a vial, then, dried it at  $80^\circ\text{C}$  oven for overnight.  $^1\text{H}$  NMR spectra were recorded in  $\text{CDCl}_3$  on a Varian Unity spectrometer (400 MHz for  $^1\text{H}$  NMR) at  $27^\circ\text{C}$ ).

**Note:**  $^1\text{H}$  NMR spectra show that the organic ligands on the surface of NP micelles were both ODE and DTAB, as shown in **Figure S6d**. In contrast, the residual organic ligands on the surface of  $\text{Fe}_3\text{O}_4$  QNS were only ODE, while DTAB was not measurable in **Figure S6e**.  $^1\text{H}$  NMR results confirmed the loss of DTAB and presence of ODE during the assembly process.

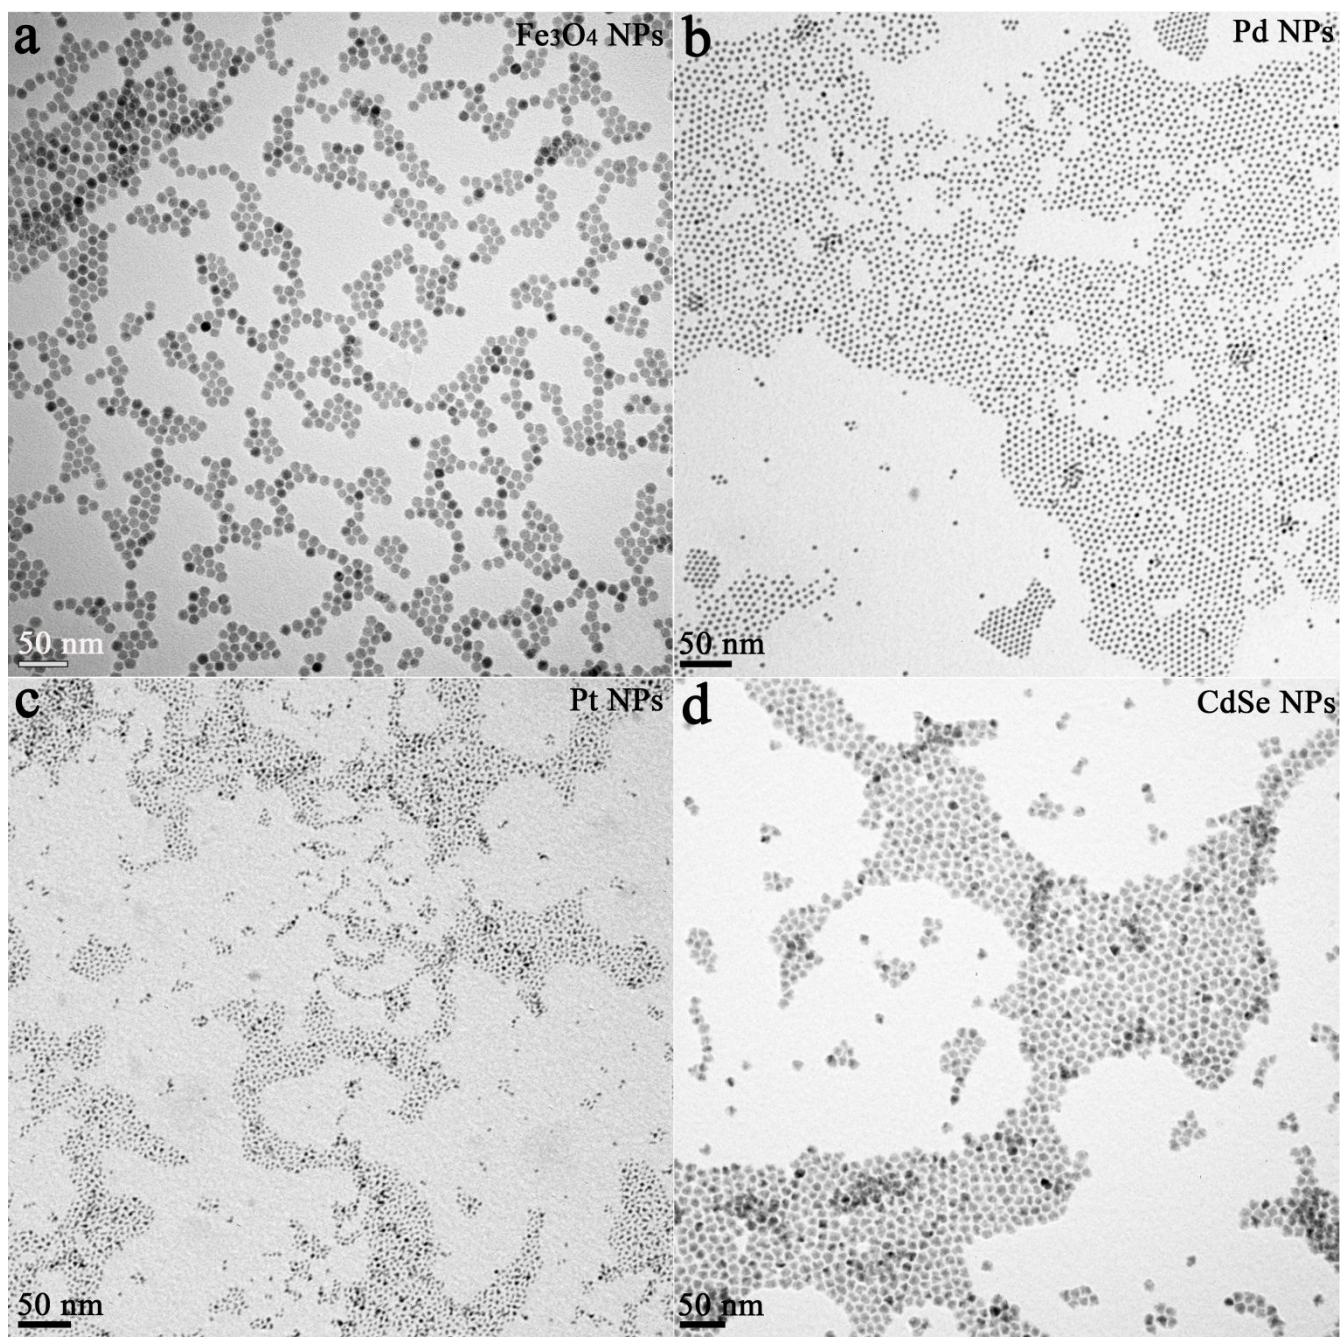

**Figure S7** TEM images of a) Fe<sub>3</sub>O<sub>4</sub> NPs (~16 nm); b) Pd NPs (~6 nm); c) Pt NPs (~ 3.5 nm); d) CdSe NPs (~15 nm).

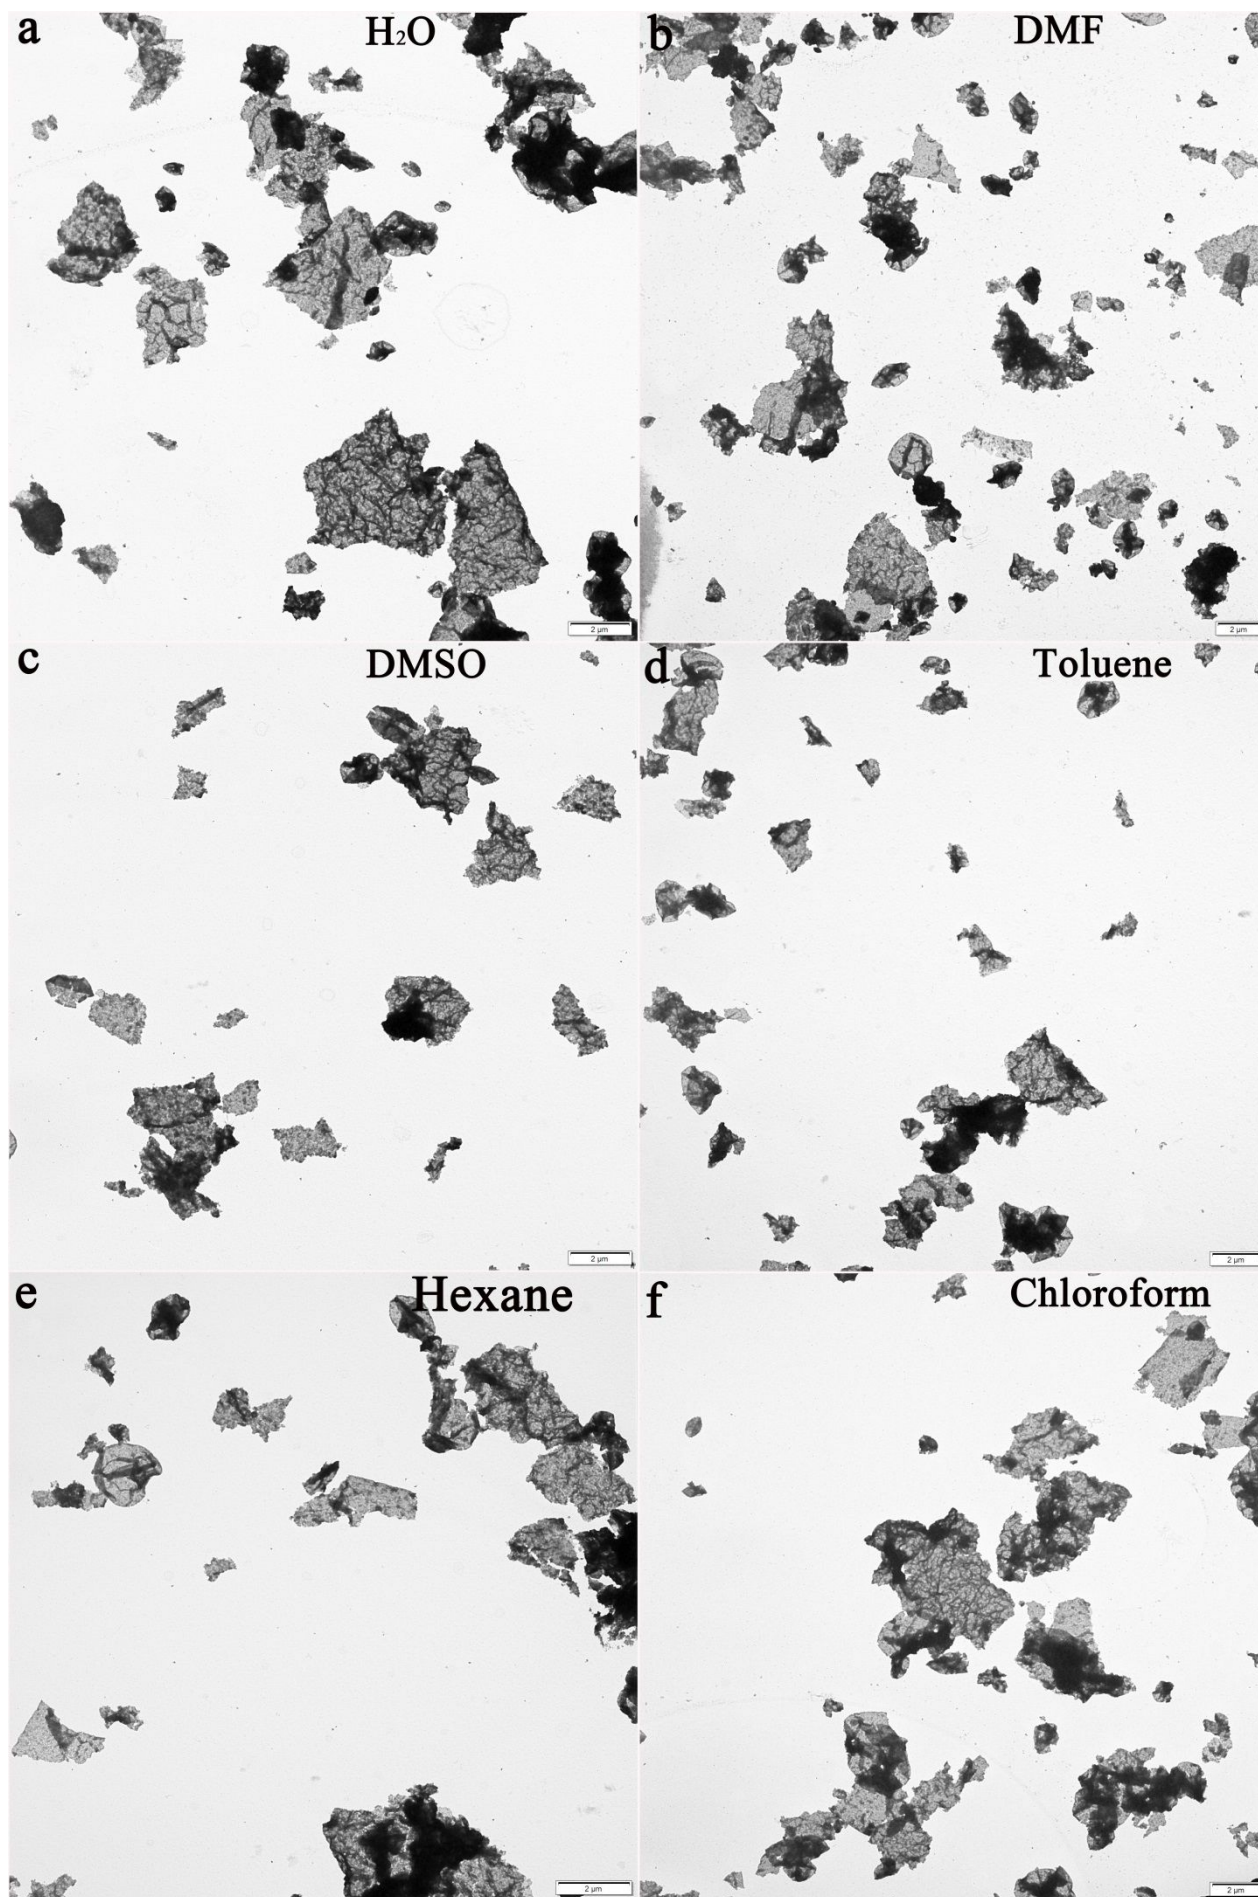

**Figure S8** The TEM images of free-standing 2D binary QNS (Fe<sub>3</sub>O<sub>4</sub> NPs and Pd NPs) in different solvents after keeping day: a) DI-water; b) DMF; c) DMSO; d) toluene; e) hexane; d) chloroform; **Figure 1** for sample in ethanol.

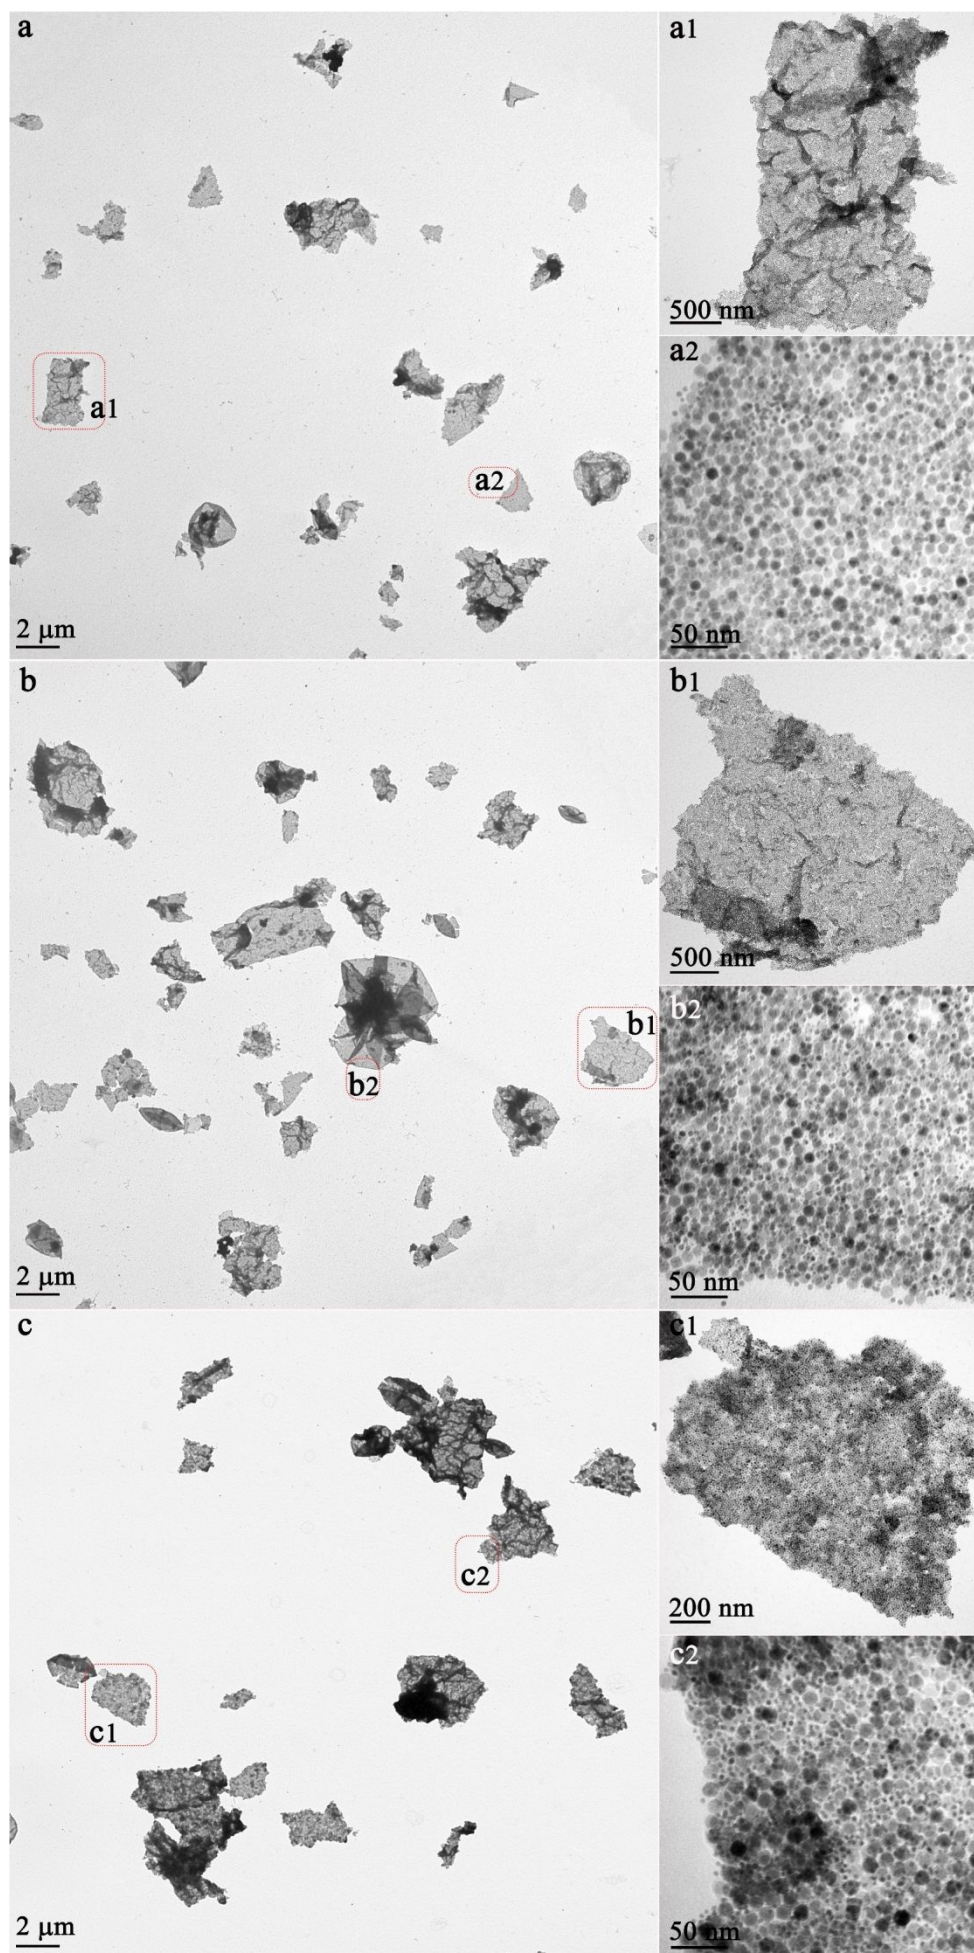

**Figure S9** TEM images of 2D binary QNS from co-assembly of Fe<sub>3</sub>O<sub>4</sub> NPs and Pd NPs with different Fe<sub>3</sub>O<sub>4</sub>/Pd particle ratios: a-a2) 1:1; b-b2) 1:2; c-c2) 1:8.23.

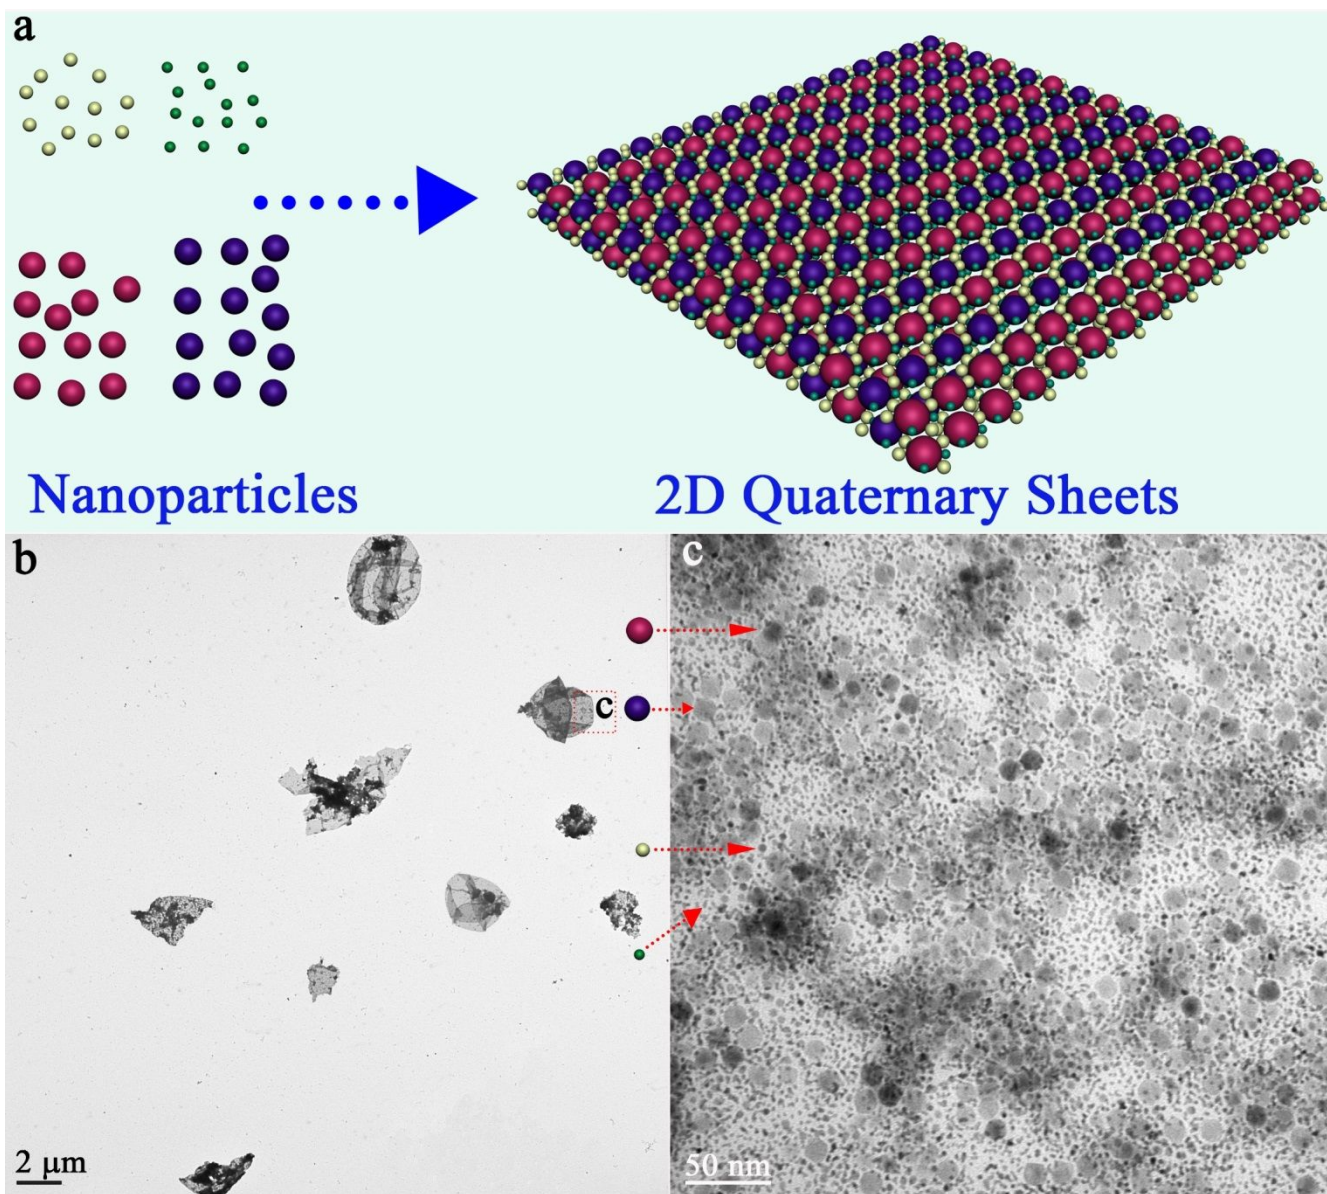

**Figure S10** a) Scheme for 2D quaternary QNS from assembly of four types of NPs; b-c) TEM images of 2D quaternary QNS of  $\text{Fe}_3\text{O}_4$  - CdSe - Pd - Pt.

## References:

1. Park, J.; An, K.; Hwang, Y.; Park, J.-G.; Noh, H.-J.; Kim, J.-Y.; Park, J.-H.; Hwang, N.-M.; Hyeon, T., Ultra-large-scale syntheses of monodisperse nanocrystals. *Nat Mater* **2004**, *3* (12), 891-895.
2. Kim, S.-W.; Park, J.; Jang, Y.; Chung, Y.; Hwang, S.; Hyeon, T.; Kim, Y. W., Synthesis of Monodisperse Palladium Nanoparticles. *Nano letters* **2003**, *3* (9), 1289-1291.
3. Wang, C.; Daimon, H.; Onodera, T.; Koda, T.; Sun, S., A General Approach to the Size- and Shape-Controlled Synthesis of Platinum Nanoparticles and Their Catalytic Reduction of Oxygen. *Angewandte Chemie International Edition* **2008**, *47* (19), 3588-3591.
4. Qian, L.; Zheng, Y.; Xue, J. G.; Holloway, P. H., Stable and efficient quantum-dot light-emitting diodes based on solution-processed multilayer structures. *Nat Photonics* **2011**, *5* (9), 543-548.
5. Shahmiri, M.; Ibrahim, N. A.; Shayesteh, F.; Asim, N.; Motallebi, N., Preparation of PVP-coated copper oxide nanosheets as antibacterial and antifungal agents. *Journal of Materials Research* **2013**, *28* (22), 3109-3118.
6. Zhu, M.-Q.; Wang, L.-Q.; Exarhos, G. J.; Li, A. D. Q., Thermosensitive Gold Nanoparticles. *Journal of the American Chemical Society* **2004**, *126* (9), 2656-2657.
7. Boles, M. A.; Engel, M.; Talapin, D. V., Self-Assembly of Colloidal Nanocrystals: From Intricate Structures to Functional Materials. *Chemical Reviews* **2016**, *116* (18), 11220-11289.
8. Min, Y.; Akbulut, M.; Kristiansen, K.; Golan, Y.; Israelachvili, J., The role of interparticle and external forces in nanoparticle assembly. *Nat Mater* **2008**, *7* (7), 527-538.
9. Rabani, E.; Egorov, S. A., Solvophobic and Solvophilic Effects on the Potential of Mean Force between Two Nanoparticles in Binary Mixtures. *Nano letters* **2002**, *2* (1), 69-72.
